# Supplementary material for: Green Synthesis of Gold and Silver Nanoparticles Using Leaf Extract of Capsicum chinense Plant
Source: MDPI journal article supplement (doi:10.3390/molecules27051692), 2022-03-04
Supplement: s1 [file s1]

# Green synthesis of gold and silver nanoparticles with leaf extract of *Capsicum chinense* plant

Diego Alberto Lomelí-Rosales<sup>1</sup>, Adalberto Zamudio-Ojeda <sup>2</sup>, Oscar Kevin Reyes-Maldonado <sup>1</sup>, Morelia Eunice Ló-pez-Reyes<sup>1</sup>, Georgina Cristina Basulto-Padilla<sup>1</sup>, Edgar José Lopez-Naranjo <sup>3</sup>, Víctor Manuel Zuñiga-Mayo <sup>4\*</sup> and Gilberto Velázquez-Juárez<sup>1\*</sup>

<sup>1</sup> Departamento de Química, Centro Universitario de Ciencias Exactas e Ingenierías, Universidad de Guadalajara. Blvd. Marcelino García Barragán #1421, C.P. 44430, Guadalajara, Jalisco, México; diego.lomeli4077@aca-demicos.udg.mx (D.A.L-R.); oscar.reyes@alumnos.udg.mx (O. K: R-M.); morelia.lopez@academi-cos.udg.mx (M. E. L-R); georgina.basulto@alumnos.udg.mx (G. C B-P.); gilberto.velazquez@academi-cos.udg.mx (G. V-J.).

<sup>2</sup> Departamento de Física, Centro Universitario de Ciencias Exactas e Ingenierías, Universidad de Guadalajara. Blvd. Marcelino García Barragán #1421, C.P. 44430, Guadalajara, Jalisco, México; adalberto.zojeda@aca-demicos.udg.mx (A. Z-O.).

<sup>3</sup> Departamento de Ingeniería de Proyectos, Universidad de Guadalajara, José Guadalupe Zuno # 48, Zapopan, Jalisco, 45101, México; edgar.lopezn@academicos.udg.mx (E. J. L-N.).

<sup>4</sup> CONACyT-Instituto de Fitosanidad, Colegio de Postgraduados, Campus Montecillo, Texcoco, Estado de Mé-xico, México. zuniga.victor@colpos.mx (V. M. Z-M.). \* Correspondence: gilberto.velazquez@academicos.udg.mx (G. V-J.); zuniga.victor@colpos.mx (V. M. Z-M.).

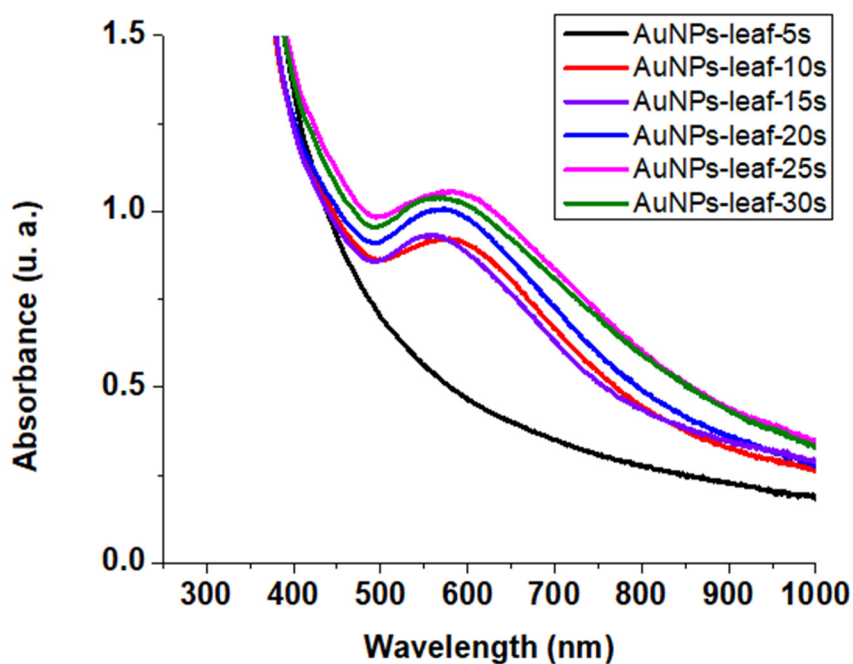

**Figure S1.** UV-vis absorption spectra of AuNPs at different times of microwave light radiation.

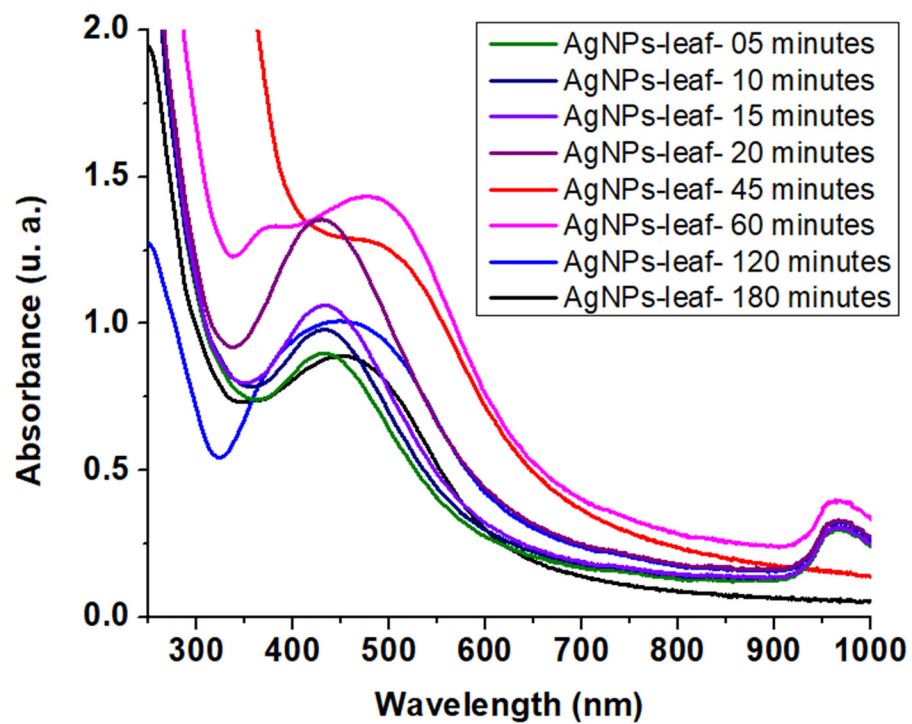

**Figure S2.** UV-vis absorption spectra of AgNPs-leaf at different times of UV light radiation.
